# Supplementary material
Source: PubMed Central journal article supplement (PMC6465078)
Supplement: NIHMS1009909-supplement-Supporting_Information.pdf [file NIHMS1009909-supplement-Supporting_Information.pdf]

**SUPPORTING INFORMATION****Novel In Vitro Method Reveals Drugs that Inhibit Organic Solute Transporter Alpha/Beta (OST $\alpha/\beta$ )**

Melina M. Malinen<sup>1</sup>, Antti Kauttonen<sup>1,2</sup>, James J. Beaudoin<sup>1</sup>, Noora Sjöstedt<sup>1</sup>, Paavo Honkakoski<sup>2</sup>, Kim L. R. Brouwer<sup>1\*</sup>

*<sup>1</sup>Division of Pharmacotherapy and Experimental Therapeutics, UNC Eshelman School of Pharmacy, University of North Carolina at Chapel Hill, Chapel Hill, North Carolina 27599-7360, United States*

*<sup>2</sup>School of Pharmacy, Faculty of Health Sciences, University of Eastern Finland, 70211 Kuopio, Finland*

**Supporting Table 1.** Inhibition of organic solute transporter  $\alpha/\beta$  (OST $\alpha/\beta$ )-mediated dehydroepiandrosterone sulfate (DHEAS) transport by 77 test compounds/ fixed dose combinations, registered drug-induced liver injury (DILI) cases, liver injury causality of the test compounds and reported transporter inhibition.

| Compound                        | OST $\alpha/\beta$ Inhibition (% of control) |     |         | Cholestatic DILI cases <sup>a</sup> | Hepatotoxicity Likelihood <sup>b</sup> | Verified DILI causality <sup>c</sup> | Label Section <sup>c</sup> | Reported Inhibition <sup>d</sup>                                   |
|---------------------------------|----------------------------------------------|-----|---------|-------------------------------------|----------------------------------------|--------------------------------------|----------------------------|--------------------------------------------------------------------|
|                                 | Mean                                         | SEM | p-value |                                     |                                        |                                      |                            |                                                                    |
| <b><i>DILIN dataset</i></b>     |                                              |     |         |                                     |                                        |                                      |                            |                                                                    |
| Vancomycin                      | 119                                          | 11  | ns      | 1                                   | —                                      | 2                                    | —                          | —                                                                  |
| Regorafenib                     | 116                                          | 3   | ns      | 1                                   | —                                      | 2                                    | Warnings and precautions   | ABCC3                                                              |
| Azithromycin                    | 116                                          | 8   | ns      | 2                                   | A                                      | 2                                    | Adverse reactions          | ABCB1                                                              |
| Nicotinic Acid                  | 115                                          | 3   | ns      | 1                                   | —                                      | 1                                    | Warnings and precautions   | —                                                                  |
| Duloxetine                      | 115                                          | 8   | ns      | 3                                   | B                                      | 1                                    | Warnings and precautions   | —                                                                  |
| Sulfamethoxazole + Trimethoprim | 112                                          | 9   | ns      | 10                                  | —                                      | 2                                    | —                          | —                                                                  |
| Meropenem                       | 110                                          | 14  | ns      | 2                                   | D                                      | 2                                    | Warnings and precautions   | —                                                                  |
| Rosuvastatin                    | 108                                          | 3   | ns      | 1                                   | B                                      | 2                                    | Warnings and precautions   | ABCC3, ABCC4, ABCG2                                                |
| Verapamil                       | 108                                          | 11  | ns      | 1                                   | B                                      | 2                                    | —                          | ABCB1, ABCC1, SLC22A1, SLC22A2, SLC22A4, SLC47A1, SLC47A2, SLC01A2 |
| Meloxicam                       | 105                                          | 8   | ns      | 2                                   | —                                      | 2                                    | Warnings and precautions   | ABCB1                                                              |
| Sulindac                        | 105                                          | 5   | ns      | 1                                   | —                                      | 1                                    | Warnings and precautions   | ABCC4, SLC22A6, SLC22A7, SLC22A8, SLC22A11                         |
| Methotrexate                    | 104                                          | 7   | ns      | 2                                   | —                                      | 1                                    | Box warning                | ABCC5                                                              |
| Terbinafine                     | 104                                          | 6   | ns      | 2                                   | B                                      | 1                                    | Warnings and precautions   | —                                                                  |
| Metoclopramide                  | 104                                          | 3   | ns      | 1                                   | —                                      | 2                                    | Adverse reactions          | —                                                                  |
| Temozolomide                    | 103                                          | 5   | ns      | 3                                   | —                                      | 2                                    | Adverse reactions          | —                                                                  |
| Mercaptopurine                  | 103                                          | 6   | ns      | 3                                   | A                                      | 1                                    | Warnings and precautions   | —                                                                  |
| Trimethoprim                    | 101                                          | 6   | ns      | *                                   | —                                      | 2                                    | —                          | SLC22A2                                                            |
| Penicillamine                   | 101                                          | 8   | ns      | 1                                   | —                                      | 2                                    | Warnings and precautions   | —                                                                  |

|                               |     |    |    |    |   |   |                          |                                                        |
|-------------------------------|-----|----|----|----|---|---|--------------------------|--------------------------------------------------------|
| Moxifloxacin                  | 100 | 5  | ns | 2  | — | 2 | Adverse reactions        | —                                                      |
| Simvastatin                   | 100 | 5  | ns | 1  | A | 2 | Warnings and precautions | ABCB11, ABCG2, SLC22A1, SLC22A6, SLC22A8, SLCO2B1      |
| Azathioprine                  | 99  | 5  | ns | 1  | A | 1 | Warnings and precautions | —                                                      |
| Minocycline                   | 99  | 4  | ns | 2  | A | 1 | Warnings and precautions | —                                                      |
| Ezetimibe                     | 99  | 8  | ns | *  | C | 2 | Warnings and precautions | —                                                      |
| Nitrofurantoin                | 98  | 7  | ns | 5  | — | 1 | Warnings and precautions | ABCC4                                                  |
| Methimazole                   | 97  | 4  | ns | 1  | — | 1 | —                        | SLC22A4                                                |
| Phenytoin                     | 97  | 5  | ns | 1  | — | 1 | Warnings and precautions | —                                                      |
| Cefaclor                      | 96  | 6  | ns | 1  | — | 2 | Adverse reactions        | SLC15A2                                                |
| Cefotaxime                    | 96  | 6  | ns | 1  | — | 2 | Adverse reactions        | ABCC4, SLC22A6, SLC22A7, SLC22A8, SLC22A11             |
| Acyclovir                     | 95  | 16 | ns | 1  | D | 2 | Adverse reactions        | —                                                      |
| Rifampicin                    | 95  | 4  | ns | 1  | — | 1 | Warnings and precautions | ABCB11, ABCC2, ABCC3, ABCC4, SLC22A6, SLCO1B1, SLCO1B3 |
| Enalapril                     | 94  | 8  | ns | 1  | B | 2 | Adverse reactions        | —                                                      |
| Cefazolin                     | 94  | 9  | ns | 10 | — | 2 | Adverse reactions        | SLC22A6, SLC22A8, SLC22A11                             |
| Ceftriaxone                   | 93  | 9  | ns | 1  | — | 2 | —                        | ABCC4, SLC22A6, SLC22A8, SLC22A11                      |
| Ciprofloxacin                 | 91  | 7  | ns | 4  | B | 1 | —                        | —                                                      |
| Alfuzosin                     | 90  | 8  | ns | 1  | C | 2 | Adverse reactions        | —                                                      |
| Allopurinol                   | 89  | 11 | ns | 2  | A | 1 | Warnings and precautions | —                                                      |
| Artemisinin                   | 89  | 4  | ns | 1  | D | — | —                        | —                                                      |
| Amoxicillin + Clavulanic Acid | 89  | 9  | ns | 42 | A | — | —                        | —                                                      |
| Carbamazepine                 | 89  | 9  | ns | 1  | A | 1 | Warnings and precautions | —                                                      |
| Ezetimibe + Simvastatin       | 88  | 7  | ns | 2  | — | 2 | Warnings and precautions | —                                                      |

|                                                 |    |    |         |   |   |   |                          |                                      |
|-------------------------------------------------|----|----|---------|---|---|---|--------------------------|--------------------------------------|
| Metaxalone                                      | 87 | 8  | ns      | 1 | E | 2 | Adverse reactions        | —                                    |
| Hydralazine                                     | 86 | 13 | ns      | 2 | — | 2 | Adverse reactions        | —                                    |
| Levofloxacin                                    | 86 | 4  | ns      | 4 | — | 1 | Warnings and precautions | —                                    |
| Benazepril + Hydrochlorothiazide                | 86 | 7  | ns      | 2 | — | — | —                        | —                                    |
| Sulfamethoxazole                                | 86 | 15 | ns      | * | — | — | —                        | —                                    |
| Amoxicillin                                     | 84 | 10 | ns      | 3 | B | 2 | Adverse reactions        | SLC15A2                              |
| Clavulanic Acid                                 | 84 | 4  | ns      | * | — | — | —                        | —                                    |
| Hydrochlorothiazide                             | 83 | 7  | ns      | * | D | 2 | Adverse reactions        | SLC22A6, SLC22A7, SLC22A8            |
| Benazepril                                      | 83 | 11 | ns      | * | D | 2 | Adverse reactions        | —                                    |
| Doxycycline                                     | 81 | 3  | ns      | 1 | C | 2 | Adverse reactions        | —                                    |
| Estradiol                                       | 81 | 3  | ns      | 1 | — | 2 | Adverse reactions        | —                                    |
| Fenofibrate                                     | 81 | 4  | ns      | 2 | B | 2 | Warnings and precautions | ABCB11, SLCO1B1                      |
| Creatine                                        | 81 | 3  | ns      | 1 | — | — | —                        | SLC22A2**                            |
| Cefuroxime                                      | 80 | 5  | ns      | 1 | — | 2 | —                        | ABCC4                                |
| Oxaliplatin                                     | 79 | 12 | ns      | 3 | — | 1 | Warnings and precautions | —                                    |
| Amiodarone                                      | 79 | 8  | ns      | 1 | A | 1 | Box warning              | ABCB1                                |
| Lovastatin                                      | 79 | 4  | ns      | 2 | B | 2 | Warnings and precautions | ABCB11, ABCC3                        |
| Atorvastatin                                    | 65 | 5  | <0.0005 | 4 | A | 1 | Warnings and precautions | ABCB11, ABCC3, ABCC4, ABCG2, SLCO2B1 |
| Norgestimate                                    | 59 | 5  | <0.0001 | * | — | 2 | Adverse reactions        | —                                    |
| Ethinylestradiol                                | 36 | 5  | <0.0001 | * | — | 3 | Adverse reactions        | ABCB11, ABCC3***                     |
| Ethinylestradiol + Norgestimate                 | 32 | 3  | <0.0001 | 1 | — | 2 | Adverse reactions        | —                                    |
| <b>Reported OStα/β substrates or inhibitors</b> |    |    |         |   |   |   |                          |                                      |
| Digoxin                                         | 95 | 6  | ns      | — | E | 4 | —                        | ABCB1, ABCB4, SLC51A/SLC51B, SLCO1B3 |

|                               |     |   |         |   |   |   |                          |                                                                                                        |
|-------------------------------|-----|---|---------|---|---|---|--------------------------|--------------------------------------------------------------------------------------------------------|
| Estrone sulfate               | 88  | 6 | ns      | — | — | 3 | Adverse reactions        | ABCC1, SLC51A/SLC51B, SLCO1B1, SLCO1B3                                                                 |
| Sulfobromophthalein           | 86  | 6 | ns      | — | — | — | —                        | SLC10A1, SLC51A/SLC51B, SLCO1A2, SLCO1B1, SLCO1B3, SLCO2B1                                             |
| Probenecid                    | 80  | 3 | ns      | — | — | 3 | Adverse reactions        | ABCC4, ABCC5, ABCC6, SLC22A6, SLC22A7, SLC22A8, SLC22A11, SLC22A12, SLCO1B3                            |
| Indomethacin                  | 79  | 5 | ns      | — | — | 1 | Warnings and precautions | ABCB11, ABCC1, ABCC2, ABCC3, ABCC4, ABCC6, SLC22A6, SLC22A7, SLC22A8, SLC22A11, SLC51A/SLC51B, SLCO1B1 |
| Spirolactone                  | 77  | 6 | <0.05   | — | D | 2 | Adverse reactions        | SLC51A/SLC51B, SLCO1B1                                                                                 |
| Fidaxomicin                   | 37  | 3 | <0.0001 | — | E | — | —                        | ABCC3, SLC51A/SLC51B                                                                                   |
| <b>Bile acids</b>             |     |   |         |   |   |   |                          |                                                                                                        |
| Taurocholate                  | 94  | 7 | ns      | — | — | — | —                        | ABCC3, SLC51A/SLC51B, SLCO1B1                                                                          |
| Taurolithocholic acid sulfate | 88  | 7 | ns      | — | — | — | —                        | SLC51A/SLC51B                                                                                          |
| Chenodeoxycholate             | 82  | 3 | ns      | — | — | — | —                        | SLC10A2, SLCO1B1                                                                                       |
| Glycochenodeoxycholate        | 73  | 7 | <0.01   | — | — | — | —                        | ABCB11, SLC10A2, SLC51A/SLC51B                                                                         |
| <b>DILI compounds</b>         |     |   |         |   |   |   |                          |                                                                                                        |
| Paroxetine                    | 120 | 5 | ns      | — | — | 2 | Adverse reactions        | —                                                                                                      |
| Valproate                     | 99  | 4 | ns      | — | — | 1 | Box warning              | —                                                                                                      |
| Bosentan                      | 83  | 4 | ns      | — | C | 1 | Box warning              | ABCB11, ABCC3, ABCC4, SLC10A1                                                                          |
| Troglitazone                  | 73  | 7 | <0.01   | — | — | 1 | Withdrawn                | ABCB11, ABCC3, ABCC4, SLCO1B1, SLCO1B3                                                                 |
| Troglitazone sulfate          | 64  | 4 | <0.0001 | — | — | — | —                        | ABCB1                                                                                                  |

<sup>a</sup> causality and occurrence of compounds in the Drug-Induced Liver Injury Network (DILIN) dataset of 190 cholestatic patients (02.17.2017).

<sup>b</sup> hepatotoxicity likelihood categories defined in LiverTox. **A**, well known to cause liver injury, >50 cases reported; **B**, known to cause liver injury, 12-50 cases reported; **C**, probably causes liver injury, <12 cases reported; **D**, possible cause of liver injury; **E**, not believed to cause liver injury.<sup>1</sup>

<sup>c</sup> DILI causality and labeling of compounds: 1=most, 2=less, 3=ambiguous, 4=no.<sup>2</sup>

<sup>d</sup> transporter inhibition by test compounds.<sup>3-7</sup>

\*, reported only as fixed dose combination; \*\*, creatinine; \*\*\* ethinylestradiol glucuronide;

— not reported; ns, not significant; ABC, ATP-binding cassette; SLC, solute carrier transporter; SLCO, solute carrier organic anion transporter.

**Supporting Table 2.** Molecular characteristics of OST $\alpha/\beta$  inhibitors identified in this study compared to the properties of compounds that did not inhibit OST $\alpha/\beta$ . The molecular descriptors were calculated based on compound SMILES using the rcdk package in R (see details in Materials and Methods section).

|                                                           | MW   | nRotB | MLogP | nAromRings | nAcid | nBase | nSmallRings | TopoPSA | nHBDon | nHBAcc |
|-----------------------------------------------------------|------|-------|-------|------------|-------|-------|-------------|---------|--------|--------|
| <b>Noninhibitors</b>                                      |      |       |       |            |       |       |             |         |        |        |
| <b>Mean</b>                                               | 381  | 5     | 2.5   | 2          | 1     | 0     | 3           | 114     | 2      | 6      |
| <b>Median</b>                                             | 361  | 4     | 2.6   | 2          | 0     | 0     | 3           | 90      | 2      | 5      |
| <b>Min</b>                                                | 114  | 0     | 1.1   | 0          | 0     | 0     | 0           | 3       | 0      | 1      |
| <b>Max</b>                                                | 1447 | 14    | 4.9   | 5          | 3     | 5     | 8           | 530     | 19     | 27     |
| <b>Identified OST<math>\alpha/\beta</math> inhibitors</b> |      |       |       |            |       |       |             |         |        |        |
| Atorvastatin                                              | 557  | 13    | 4.21  | 4          | 1     | 0     | 4           | 115     | 3      | 6      |
| Ethinyl estradiol                                         | 296  | 0     | 3.44  | 1          | 0     | 0     | 4           | 40      | 2      | 1      |
| Fidaxomicin                                               | 1058 | 15    | 4.98  | 1          | 0     | 0     | 3           | 267     | 7      | 16     |
| Glycochenodeoxycholate                                    | 449  | 7     | 3.66  | 0          | 1     | 0     | 4           | 107     | 4      | 6      |
| Norgestimate                                              | 369  | 3     | 3.55  | 0          | 0     | 0     | 4           | 59      | 1      | 2      |
| Troglitazone                                              | 441  | 5     | 3.33  | 2          | 0     | 0     | 4           | 110     | 2      | 3      |
| Troglitazone sulfate                                      | 543  | 7     | 2.78  | 2          | 1     | 1     | 4           | 165     | 1      | 6      |
| <b>Mean</b>                                               | 531  | 7     | 3.7   | 1          | 0     | 0     | 4           | 123     | 3      | 6      |
| <b>Median</b>                                             | 449  | 7     | 3.6   | 1          | 0     | 0     | 4           | 110     | 2      | 6      |
| <b>Min</b>                                                | 296  | 0     | 2.8   | 0          | 0     | 0     | 3           | 40      | 1      | 1      |
| <b>Max</b>                                                | 1058 | 15    | 5.0   | 4          | 1     | 1     | 4           | 267     | 7      | 16     |

MW, molecular weight; nRotB, number of rotating bonds; MLogP, logP determined by Moriguchi's method; nAromRings, number of aromatic rings; nAcid, acidic group count; nBase, basic group count; nSmallRings, number of small rings; TopoPSA, topological polar surface area; nHBDon, number of hydrogen bond donors; nHBAcc, number of hydrogen bond acceptors.

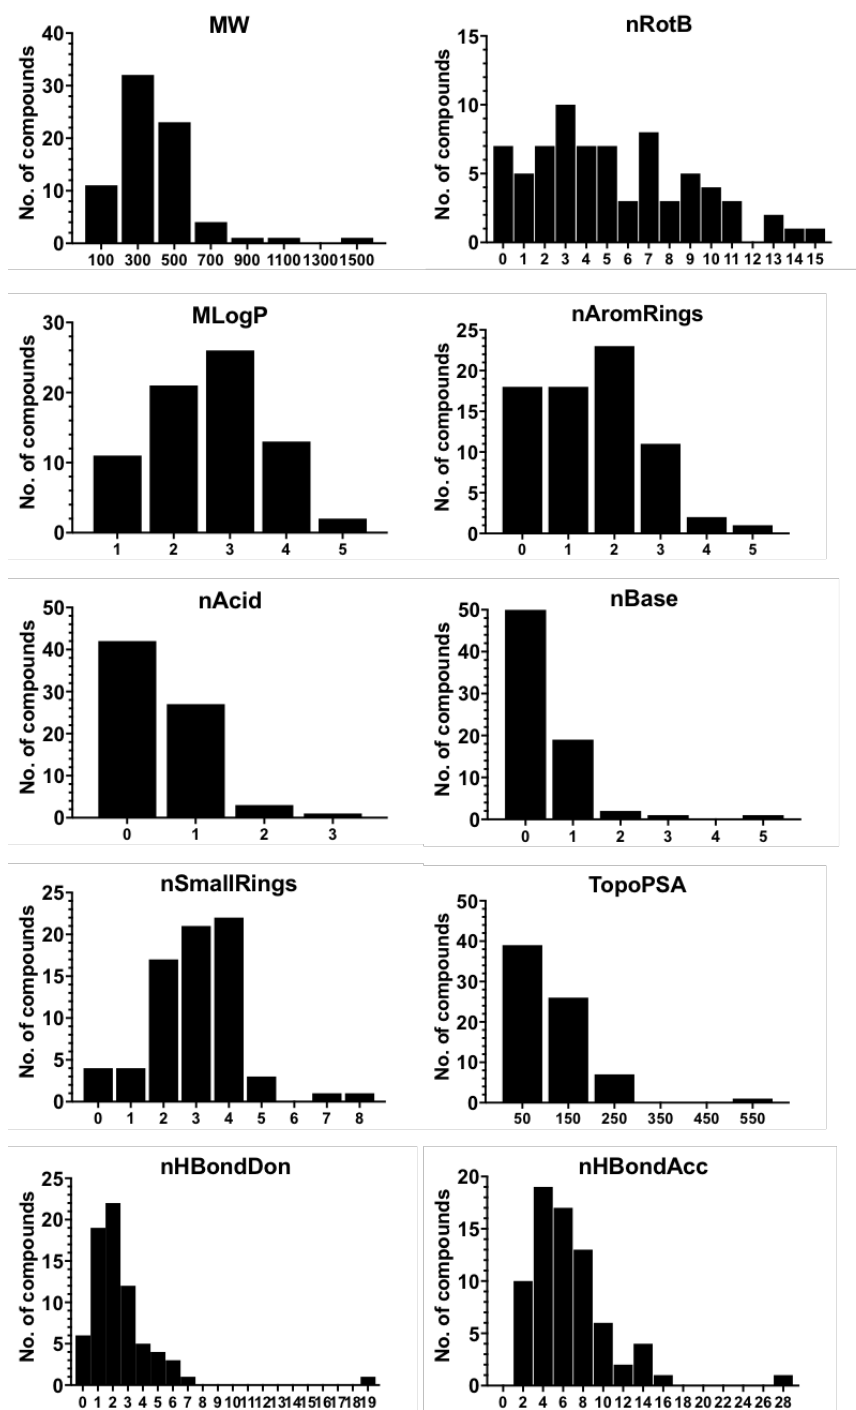

**Supporting Figure 1.** The frequency distribution of the molecular descriptors of the test compound dataset investigated for OST $\alpha/\beta$  inhibition. The descriptors were calculated based on compound SMILES using the rcdk package in R (see details in Materials and Methods section). MW, molecular weight; nRotB, number of rotating bonds; MLogP, logP determined by Moriguchi's method; nAromRings, number of aromatic rings; nAcid, acidic group count; nBase, basic group count; nSmallRings, number of small rings; TopoPSA, topological polar surface area; nHBDon, number of hydrogen bond donors; nHBondAcc, number of hydrogen bond acceptors.



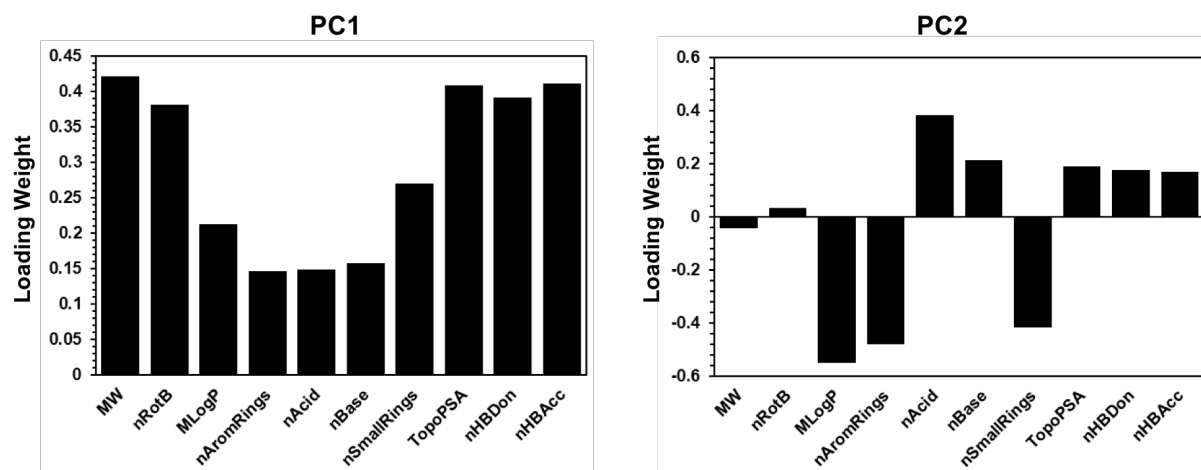

**Supporting Figure 2.** The influence of descriptors, shown as loading weights, on the first two principal components (PC1 panel, PC2 panel) of the principal component analysis (PCA). The PCA was performed on the library of the tested compounds and FDA approved drugs included in the IDA2PM library ( $n = 1583$ ). MW, molecular weight; nRotB, number of rotating bonds; MLogP, logP determined by Moriguchi's method; nAromRings, number of aromatic rings; nAcid, acidic group count; nBase, basic group count; nSmallRings, number of small rings; TopoPSA, topological polar surface area; nHBDon, number of hydrogen bond donors; nHBAcc, number of hydrogen bond acceptors.

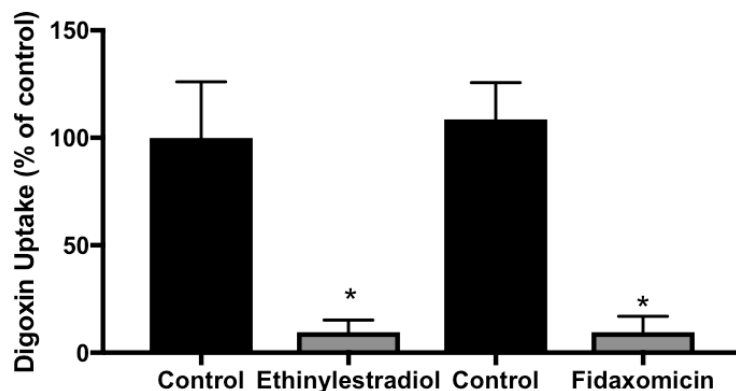

**Supporting Figure 3.** The inhibitory effect of ethinylestradiol and fidaxomicin on OST $\alpha/\beta$ -mediated digoxin uptake. OSTab and Mock cells were treated with a test compound either prior to (ethinylestradiol, 100  $\mu$ M) or with (fidaxomicin, 100  $\mu$ M) the probe substrate, [ $^3$ H]-digoxin (300 nCi/ml; 1  $\mu$ M) in modified extracellular fluid (pH 7.4) at 37°C. Background levels derived from Mock cells were subtracted, and uptake measurements were normalized to total cell protein. Data are expressed as percentage of vehicle control (mean  $\pm$  range) from one experiment. \*,  $p < 0.05$ .

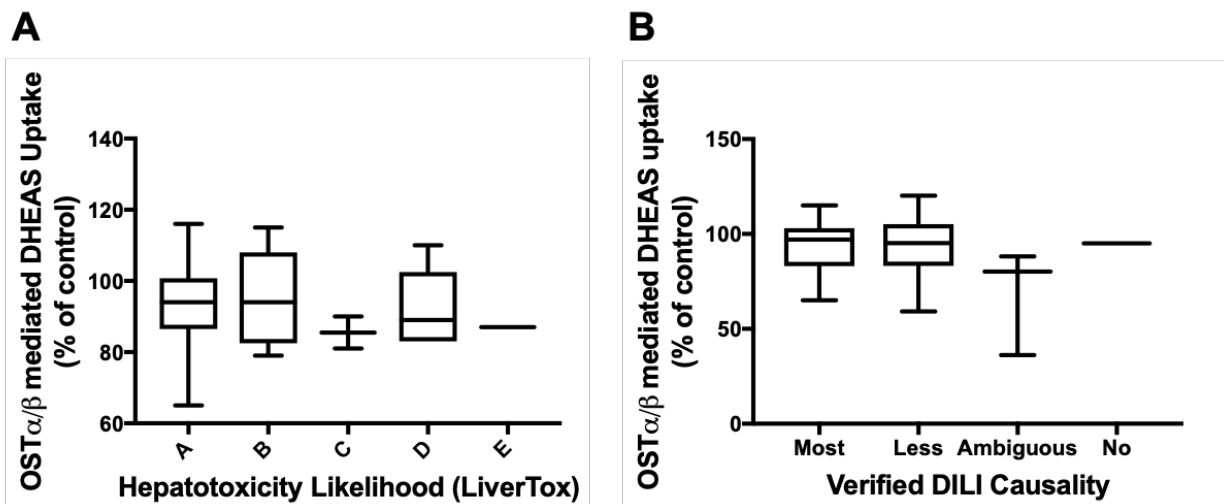

**Supporting Figure 4.** OST $\alpha/\beta$ -mediated uptake of DHEAS in the presence of the tested compounds versus their A) hepatotoxicity likelihood and B) verified DILI causality. Figure is based on the data from Supporting Table 1.

## SUPPORTING REFERENCES

- (1) National Institutes of Health, LiverTox website. <https://livertox.nih.gov/> (accessed 5.15.2018)
- (2) Chen, M.; Suzuki, A.; Thakkar, S.; Yu, K.; Hu, C.; Tong, W. DILIRank: the largest reference drug list ranked by the risk for developing drug-induced liver injury in humans. *Drug. Discov. Today* **2016**, *21*, (4), 648-53.
- (3) Ali, I.; Welch, M. A.; Lu, Y.; Swaan, P. W.; Brouwer, K. L. R. Identification of novel MRP3 inhibitors based on computational models and validation using an in vitro membrane vesicle assay. *Eur. J. Pharm. Sci.* **2017**, *103*, 52-59.
- (4) Morgan, R. E.; van Staden, C. J.; Chen, Y.; Kalyanaraman, N.; Kalanzi, J.; Dunn, R. T., 2nd; Afshari, C. A.; Hamadeh, H. K. A multifactorial approach to hepatobiliary transporter assessment enables improved therapeutic compound development. *Toxicol. Sci.* **2013**, *136*, (1), 216-41.
- (5) Yang, K.; Pfeifer, N. D.; Kock, K.; Brouwer, K. L. R. Species differences in hepatobiliary disposition of taurocholic acid in human and rat sandwich-cultured hepatocytes: implications for drug-induced liver injury. *J. Pharmacol. Exp. Ther.* **2015**, *353*, (2), 415-23.
- (6) Funk, C.; Pantze, M.; Jehle, L.; Ponelle, C.; Scheuermann, G.; Lazendic, M.; Gasser, R. Troglitazone-induced intrahepatic cholestasis by an interference with the hepatobiliary export of bile acids in male and female rats. Correlation with the gender difference in troglitazone sulfate formation and the inhibition of the canalicular bile salt export pump (Bsep) by troglitazone and troglitazone sulfate. *Toxicology* **2001**, *167*, (1), 83-98.
- (7) Morrissey, K. M.; Wen, C. C.; Johns, S. J.; Zhang, L.; Huang, S. M.; Giacomini, K. M. The UCSF-FDA TransPortal: a public drug transporter database. *Clin. Pharmacol. Ther.* **2012**, *92*, (5), 545-6.
